# Supplementary material for: Gamma-glutamylcysteine synthetase and tryparedoxin 1 exert high control on the antioxidant system in Trypanosoma cruzi contributing to drug resistance and infectivity
Source: PubMed Central journal article supplement — Redox Biol. 2019 May 28;26:101231. doi: 10.1016/j.redox.2019.101231 (PMC6581782; doi:10.1016/j.redox.2019.101231), 2019-05-28
Supplement: mmc2.pdf [file mmc2.pdf]

## SUPPLEMENTARY MATERIAL 2

**Gamma-glutamylcysteine synthetase and tryparedoxin 1 exert high control on the antioxidant system in *Trypanosoma cruzi* contributing to drug resistance and infectivity.**

by

Zabdi González-Chávez, Citlali Vázquez, Marlen Mejia-Tlachi, Claudia Márquez-Dueñas, Rebeca Manning-Cela, Rusely Encalada, Sara Rodríguez-Enríquez, Paul A.M. Michels, Rafael Moreno-Sánchez, Emma Saavedra.

Redox Biology, 2019.

**SUPPLEMENTARY MATERIAL 2. Construction of the kinetic models for  $T(SH)_2$  synthesis and  $T(SH)_2$ -dependent peroxide reduction.**

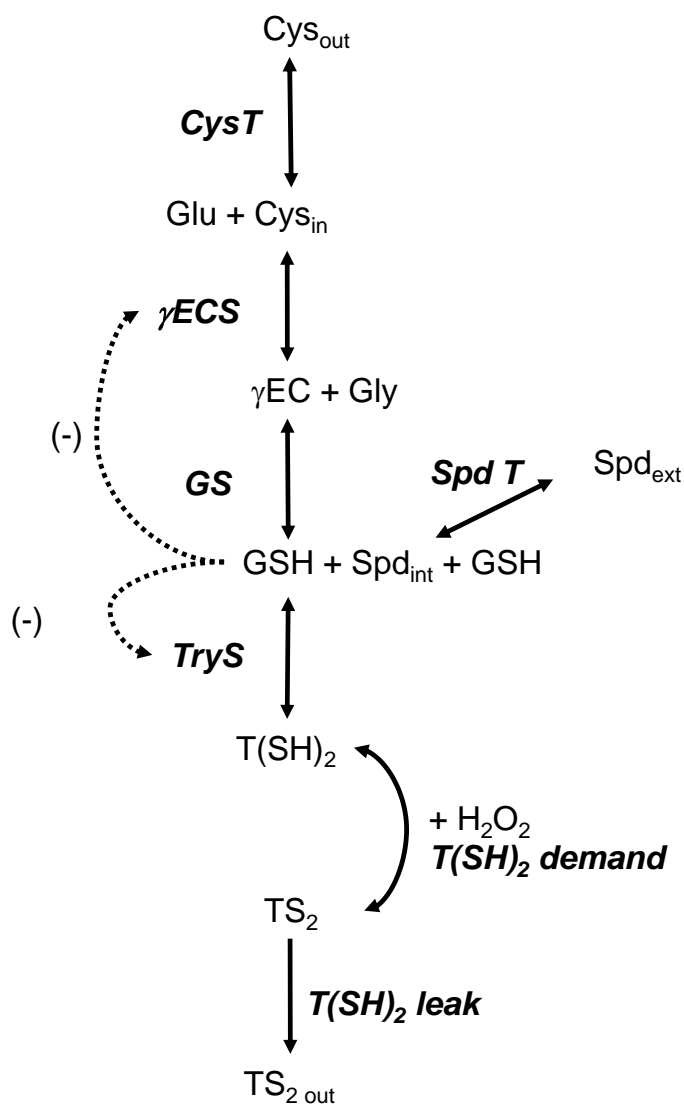

**Fig. S2.1 Reactions included in the  $T(SH)_2$  synthesis pathway kinetic model**

$CysT$ , Cys transport;  $Cys_{out}$ , external cysteine;  $Cys_{in}$  internal Cys;  $SpdT$ , spermidine transport;  $Spd_{out}$ , external spermidine;  $Spd_{in}$ , internal spermidine;  $TS_2$ , oxidized trypanothione;  $TS_{2out}$ , excreted oxidized trypanothione. All other abbreviations are shown in Fig. 1.

**Table S2.1 Summary of the kinetic parameter values for the T(SH)<sub>2</sub> synthesis model**

|                               | Reaction coded in Gepasi/Copasi | Kinetic parameters |                 | Comments | Reaction mechanism                                |
|-------------------------------|---------------------------------|--------------------|-----------------|----------|---------------------------------------------------|
| <b>CysT</b>                   | Cysout = Cysin                  | $Vm_f$             | 0.002(0.004)    | a        | Uni-uni reversible                                |
|                               |                                 | $Km_{Cysout}$      | 0.05            | b        |                                                   |
|                               |                                 | $K_{eq}$           | 20              | c        |                                                   |
|                               |                                 | $Km_{Cysin}$       | 0.65            | d        |                                                   |
| <b><math>\gamma</math>ECS</b> | Glu + Cysin = gEC               | $Vm_f$             | 0.00044(0.0012) | e        | Bi-uni random with GSH inhibition                 |
|                               |                                 | $\alpha$           | 1               | f        |                                                   |
|                               |                                 | $Km_{Glu}$         | 0.13            | f        |                                                   |
|                               |                                 | $Km_{Cys}$         | 0.21            | f        |                                                   |
|                               |                                 | $K_{eq}$           | 5597            | f        |                                                   |
|                               |                                 | $Ki_{GSH}$         | 1.6             | f        |                                                   |
|                               |                                 | $Km_{gEC}$         | 0.43            | f        |                                                   |
|                               |                                 | $\beta$            | 0.03            | f        |                                                   |
| <b>GS</b>                     | gEC + Gly = GSH                 | $Vm_f$             | 0.0086          | f        | Bi-uni random                                     |
|                               |                                 | $\alpha$           | 1               | f        |                                                   |
|                               |                                 | $Km_{gEC}$         | 0.04            | f        |                                                   |
|                               |                                 | $Km_{Gly}$         | 1.2             | f        |                                                   |
|                               |                                 | $K_{eq}$           | 5597            | f        |                                                   |
|                               |                                 | $Km_{GSH}$         | 12.6            | f        |                                                   |
| <b>SpdT</b>                   | Spdext = Spdint                 | $Vm_f$             | 0.0058          | f        | Uni-uni reversible                                |
|                               |                                 | $Km_{Spdext}$      | 0.00084         | f        |                                                   |
|                               |                                 | $K_{eq}$           | 1000            | f        |                                                   |
|                               |                                 | $Km_{Spdint}$      | 10              | f        |                                                   |
| <b>TryS</b>                   | GSH + Spdint + GSH = TSH        | $Vm_f$             | 0.0012 (0.002)  | g        | Tri-uni random with competitive inhibition by GSH |
|                               |                                 | $\alpha$           | 1               | h        |                                                   |
|                               |                                 | $Km_{GSH}$         | 1.6             | i        |                                                   |
|                               |                                 | $Km_{Spdint}$      | 0.86            | f        |                                                   |
|                               |                                 | $Km_{GSH}$         | 1.6             | i        |                                                   |
|                               |                                 | $K_{eq}$           | 5597            | f        |                                                   |
|                               |                                 | $Ki_{GSH}$         | 7.3             | i        |                                                   |
|                               |                                 | $Km_{TSH}$         | 1               | h        |                                                   |
|                               |                                 | $\beta$            | 1               | h        |                                                   |
| <b>TSH demand</b>             | TSH + H2O2 = TS2                | $Vm_f$             | 0.005           | j        | Bi-uni ordered reversible                         |
|                               |                                 | $Km_{TSH}$         | 0.003           | k        |                                                   |
|                               |                                 | $Km_{peroxide}$    | 0.008           | l        |                                                   |
|                               |                                 | $K_{eq}$           | 100             | m        |                                                   |
|                               |                                 | $Km_{TS2}$         | 10              | n        |                                                   |
| <b>TS2 leak</b>               | TS2-> TS2out                    | $k_1$              | 0.002           | o        | Mass action irreversible                          |

$Km$  and  $Ki$  in mM;  $Vm$  in  $\mu\text{mol}/\text{min} \times \text{mg}$  of cellular protein. The CysT,  $\gamma$ ECS and TryS  $Vm$  values in parentheses were parameterized to simulate the increases in thiol contents in the Cys supplementation experiments.

<sup>a</sup> $Vm$  parameterized to reach the physiological intracellular Cys concentrations.

<sup>b</sup> $Km$  reported in [34].

<sup>c</sup> $K_{eq}$  parameterized to maintain Cys concentrations within the physiological interval.

Cysteine transport in *T. cruzi* depends on extracellular pH [34].

<sup>d</sup> $K_p$  obtained from adjusting CysT kinetic data reported by [34] to substrate inhibition

$$v = \frac{V_m * S}{K_m + S + \frac{S^2}{K_i}}$$

<sup>e</sup> $V_m$  parameterized: the maximum *ex vivo* flux of T(SH)<sub>2</sub> synthesis attained in the OE-TryS parasites (0.3 nmoles/min x mg cell protein) was assumed to be near the  $V_m$  of  $\gamma$ ECS considering negligible control by GS.

<sup>f</sup> Kinetic values used in our previously reported model [26].

<sup>g</sup> $V_m$  parameterized: the maximum *ex vivo* flux of T(SH)<sub>2</sub> synthesis attained in the OE- $\gamma$ ECS parasites (1.1-2.4 nmoles/min x mg cell protein; Table S1.2 in SM1) was assumed to be near the  $V_m$  of TryS, assuming negligible control of GS [26].

<sup>h</sup> arbitrary values.

<sup>i</sup> $K_m$  and  $K_i$  values previously reported for TryS using cell soluble protein of the OE-TryS parasites [29].

<sup>j</sup> maximum *ex vivo* flux of the T(SH)<sub>2</sub>-dependent peroxide reduction system using H<sub>2</sub>O<sub>2</sub> reported by our group [14].

<sup>k</sup> $K_m$  for T(SH)<sub>2</sub> of the complete reconstituted pathway [14].

<sup>l</sup> average  $K_m$  for CumOOH, tert-butOOH and H<sub>2</sub>O<sub>2</sub> of recombinant TXNPx [14].

<sup>m</sup> and <sup>n</sup>, arbitrary values.

<sup>o</sup> reaction included to allow free variation in TS<sub>2</sub> (and consequently in T(SH)<sub>2</sub>), with a parameterized  $k$  value.

**Table S2.2. Initial and fixed (F) metabolite concentrations used in the kinetic model of T(SH)<sub>2</sub> synthesis**

| (mM)    | mM                              |
|---------|---------------------------------|
| Cys out | 0.04 <b>F</b> (0.14 <b>F</b> *) |
| Cysin   | 1                               |
| Glu     | 9 <b>F</b>                      |
| gEC     | 0.15                            |
| Gly     | 9 <b>F</b>                      |
| GSH     | 1                               |
| Spdext  | 0.0011 <b>F</b>                 |
| Spdint  | 2.5                             |
| TSH     | 0.01                            |
| TS2     | 0.00001                         |
| TS2out  | 0.00001 <b>F</b>                |
| H2O2    | 0.001 <b>F</b>                  |

\* Fixed value of Cys<sub>out</sub> for the simulation in Cys supplementation experiments

### Rate equations used in the T(SH)<sub>2</sub> synthesis kinetic model

In all equations,  $K_x$  are the binding constants for the respective ligands and  $\alpha$  and  $\beta$  are the factors by which the binding of one substrate changes the affinity for the co-substrates.

#### CysT and SpdT

The rate equation was Michaelis-Menten reversible (Haldane) [62].

$$v = \frac{\frac{V_m}{K_s} \left( S \cdot \frac{P}{K_{eq}} \right)}{1 + \frac{S}{K_s} + \frac{P}{K_p}}$$

For CysT,  $S=Cys_{out}$  and  $P=Cys_{in}$ . For SpdT,  $S=Spd_{ext}$  and  $P=Spd_{int}$ .

#### $\gamma$ ECS

Bi-uni random reversible with GSH inhibition

$$v = \frac{\frac{V_m}{\alpha \cdot K_a \cdot K_b} \cdot \left( A \cdot B \cdot \frac{P}{K_{eq}} \right)}{1 + \frac{A}{K_a} + \frac{B}{K_b} + \frac{A \cdot B}{\alpha \cdot K_a \cdot K_b} + \frac{In}{K_i} + \frac{P}{K_p} + \frac{B \cdot In}{\beta \cdot K_i \cdot K_b}}$$

$A=Glu$ ,  $B=Cys_{in}$ ,  $P=\gamma EC$  and  $In= GSH$ .  $K_i$  of GSH versus Glu.

#### GS

Bi-uni random reversible

$$v = \frac{\frac{V_m}{\alpha \cdot K_a \cdot K_b} \cdot \left( A \cdot B \cdot \frac{P}{K_{eq}} \right)}{1 + \frac{A}{K_a} + \frac{B}{K_b} + \frac{P}{K_p} + \frac{A \cdot B}{\alpha \cdot K_a \cdot K_b}}$$

$A=\gamma EC$ ,  $B=Gly$  and  $P=GSH$ .

#### TryS

Tri-uni random with competitive inhibition by GSH against GSH

$$v = \frac{\frac{V_m}{\alpha \cdot K_a \cdot K_b \cdot K_c} \left( A \cdot B \cdot C \cdot \frac{P}{K_{eq}} \right)}{1 + \frac{A}{K_a} + \frac{B}{K_b} + \frac{C}{K_c} + \frac{A \cdot B}{\alpha \cdot K_a \cdot K_b} + \frac{A \cdot C}{\alpha \cdot K_a \cdot K_c} + \frac{B \cdot C}{\alpha \cdot K_b \cdot K_c} + \frac{A \cdot B \cdot C}{\alpha \cdot K_a \cdot K_b \cdot K_c} + \frac{I}{K_i} + \frac{I \cdot B}{\alpha \cdot \beta \cdot K_i \cdot K_b} + \frac{A \cdot B \cdot I}{\alpha \cdot \beta \cdot K_a \cdot K_b \cdot K_i} + \frac{P}{K_p}}$$

A= GSH, B= Spd, C is a second GSH ligated after glutathionyl-spermidine formation, P is T(SH)<sub>2</sub> and I is GSH as substrate inhibitor.

### TSH demand

Bi-uni ordered reversible

$$v = \frac{\frac{V_m}{K_a \cdot K_b} \cdot \left( A \cdot B \cdot \frac{P}{K_{eq}} \right)}{1 + \frac{A}{K_a} + \frac{P}{K_p} + \frac{A \cdot B}{K_a \cdot K_b}}$$

A= T(SH)<sub>2</sub>, B= peroxide (H<sub>2</sub>O<sub>2</sub>, CumOOH, t-butOOH), P= TS<sub>2</sub>.

### TS2 leak

Reaction that allows free variation of T(SH)<sub>2</sub> during modeling. Without this reaction TS<sub>2</sub> has to be fixed, which cancels T(SH)<sub>2</sub> variation.

Mass action irreversible

$$v = k_1 \cdot [\text{substrate}]$$

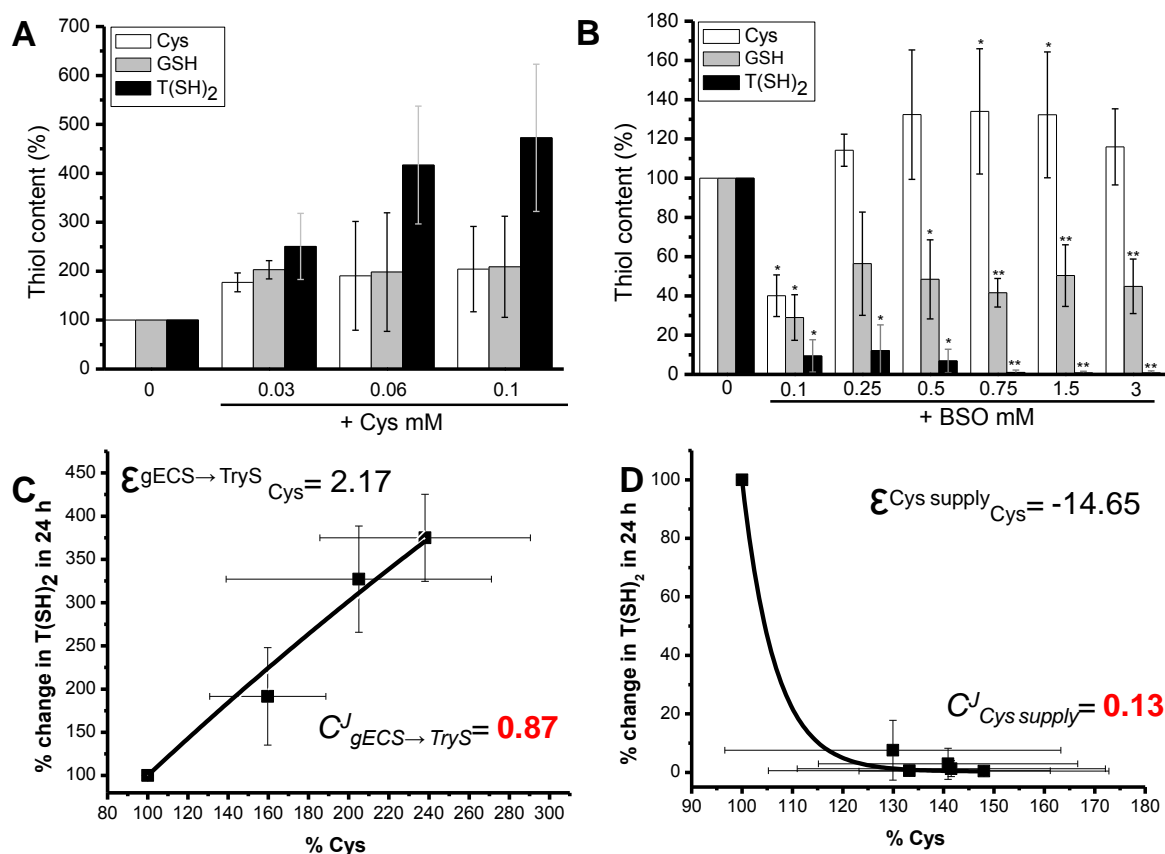

**Fig. S2.2 Elasticity analysis of the T(SH)<sub>2</sub> synthesis pathway.**

Panels A and B data replotted from [29].

(A) Parasites were supplemented with the indicated concentrations of Cys. After 24 h, the cells were harvested and the intracellular thiol contents were determined by HPLC. 100% thiol was equivalent to Cys,  $4.2 \pm 1.8$ ; GSH,  $6.9 \pm 1$ ; T(SH)<sub>2</sub>,  $4.3 \pm 1.6$  nmol/mg cell protein (n=5).

(B) The contents of Cys, GSH and T(SH)<sub>2</sub> were determined by HPLC in parasites treated with DL-(S,R)-BSO for 24 h. 100% thiol contents were Cys  $4.8 \pm 1$ , GSH  $5.7 \pm 2.2$  and T(SH)<sub>2</sub>  $3.1 \pm 0.9$  nmol/mg protein (n=17). \*p < 0.05, \*\*p < 0.01 vs. mock

(C and D) Elasticity coefficients determination. The % of T(SH)<sub>2</sub> change in 24 h vs. % of internal Cys were plotted from the two sets of experiments performed in parallel in panels A and B. The elasticity coefficient of the group of reactions that consume Cys ( $\epsilon^{consumer}_{Cys}$ ; i.e.  $\gamma$ ECS, GS and TryS) and the one that supply it ( $\epsilon^{supplier}_{Cys}$ ; i.e. CysT) are calculated from the slope of the tangent (derivative) at the point of 100% Cys. From the elasticity coefficients values, the  $C^J_{ai}$  are calculated by solving the two-equations system derived from the summation theorem ( $C^J_{supplier} + C^J_{consumer} = 1$ ) and the connectivity theorem ( $C^J_{supplier} \times \epsilon^{supplier}_{Cys} + C^J_{consumer} \times \epsilon^{consumer}_{Cys} = 0$ ) of MCA [23, 24]. The resulting  $C^J_{ai}$  values are shown in red.

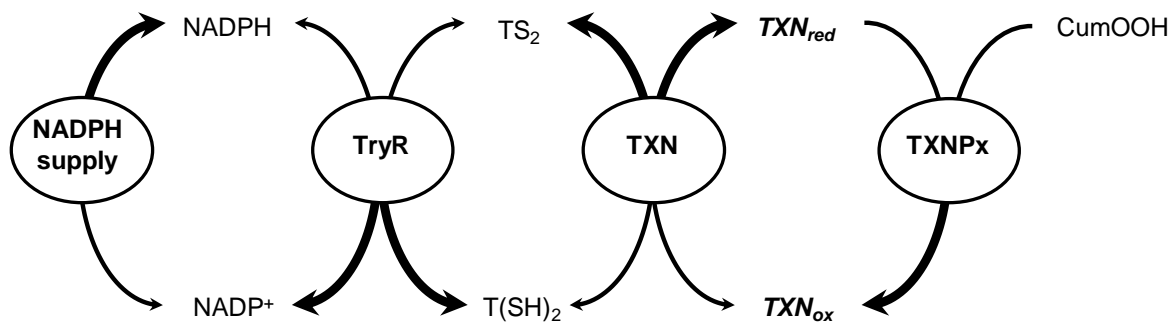

**Fig. S2.3 Reactions included in the peroxide reduction pathway kinetic model.**

All reactions are reversible except TXNPx. The bolder arrows indicate the predominant electron flux.



**Table S2.3 Summary of the kinetic parameter values for the peroxide reduction model**

|                     | <i>Reaction coded in Gepasi/Copasi</i> | <i>Kinetic parameters</i> |                | comments | Reaction mechanism           |
|---------------------|----------------------------------------|---------------------------|----------------|----------|------------------------------|
| <b>TryR</b>         | NADPH + TS2 =<br>NADP + TSH            | $Vm_f$                    | 0.264          | a        | Bi-bi ordered reversible     |
|                     |                                        | $Km_{NADPH}$              | 0.009          | a        |                              |
|                     |                                        | $Km_{TS2}$                | 0.023          | a        |                              |
|                     |                                        | $K_{eq}$                  | 3.5 e7         | b        |                              |
|                     |                                        | $Km_{NADP}$               | 0.011          | c        |                              |
|                     |                                        | $Km_{TSH}$                | 10             | d        |                              |
| <b>TXN</b>          | TSH + TXNox =<br>TS2 + TXNred          | $Vm_f$                    | 0.088          | e        | Bi-bi ping pong reversible   |
|                     |                                        | $Km_{TSH}$                | 0.092          | f        |                              |
|                     |                                        | $Km_{TXNox}$              | 0.0006 - 0.001 | g        |                              |
|                     |                                        | $K_{eq}$                  | 1000           | d        |                              |
|                     |                                        | $Vmr$                     | 0.00088        | h        |                              |
|                     |                                        | $Km_{TS2}$                | 1              | d        |                              |
|                     |                                        | $Km_{TXNred}$             | 1              | d        |                              |
|                     |                                        | $Ki_a$                    | 1              | d        |                              |
|                     |                                        | $Ki_q$                    | 1              | d        |                              |
| <b>TXNPx</b>        | CumOOH + TXNred-><br>TXNox             | $Vm_f$                    | 0.179          | e        | Bi-bi ping pong irreversible |
|                     |                                        | $Km_{cumOOH}$             | 0.011          | e        |                              |
|                     |                                        | $Km_{TXNred}$             | 0.0006         | e        |                              |
| <b>NADPH supply</b> | NADP = NADPH                           | $k_1$                     | 10             | i        | Mass action reversible       |
|                     |                                        | $k_2$                     | 1.5            | i        |                              |

$Km$  and  $Ki$  in mM;  $Vm$  in  $\mu\text{mol}/\text{min} \cdot \text{mg}$  of cellular protein.

<sup>a</sup> value reported in [26].

<sup>b</sup> value calculated reported in Table S6 in [26].

<sup>c</sup> value taken from Table S7 in [26].

<sup>d</sup> arbitrary value

<sup>e</sup> values reported in Table 1 [14].

<sup>f</sup> using the  $Km$  for T(SH)<sub>2</sub> of the recombinant (0.092 mM) or the complete reconstituted pathway (0.003 mM) [14] gave similar simulation results.

<sup>g</sup> parameterized in the interval of 0.0006 to 0.001, the first value is equal to the  $Km$  for TXN of TXNPx reported in [14].

<sup>h</sup> arbitrary value corresponding to 1/100 of the  $Vmf$

<sup>i</sup> parameterized values.

**Table S2.4. Initial and fixed (F) metabolite concentrations used in the kinetic model of peroxide reduction**

| metabolite | mM      |
|------------|---------|
| TSH        | 0.45    |
| TS2        | 0.016   |
| NADPH      | 0.16    |
| NADP       | 0.025   |
| TXNox      | 1.e-5** |
| TXNred     | 1.e-4*  |
| CumOOH     | 0.1 F   |

\*TXN concentration used in the pathway reconstitution [14]. \*\*arbitrary value considering that only 1/10 of TXN is in its oxidized state. F means fixed concentration.

### Rate equations

In all equations,  $K_a$ ,  $K_b$ ,  $K_p$  and  $K_q$  are the respective binding constants for the ligands.

### TryR

Bi bi ordered reversible kinetics similar to that used in [26]

$$v = \frac{\frac{V_m}{K_a \cdot K_b} \cdot \left( A \cdot B - \frac{P \cdot Q}{K_{eq}} \right)}{1 + \frac{A}{K_a} + \frac{A \cdot B}{K_a \cdot K_b} + \frac{P \cdot Q}{K_p \cdot K_q} + \frac{Q}{K_q}}$$

A = NADPH; B= TS2; P = NADP; Q= TSH,

### TXN equation

The oxidation/reduction of TXN was considered as a bi-bi ping-pong reversible kinetics assuming that TXN<sub>ox</sub> is first reduced by T(SH)<sub>2</sub>, releasing TS<sub>2</sub> and TXN remaining in a modified state as TXN<sub>red</sub> to further donate the electrons to TXNPx.

$$v = \frac{V_{mf} \cdot \left( [A] \cdot [B] - \frac{[P] \cdot [Q]}{K_{eq}} \right)}{[A] \cdot [B] + K_b \cdot [A] + K_a \cdot [B] \cdot \left( 1 + \frac{[Q]}{K_{iq}} \right) + \frac{V_{mf}}{V_{mr} \cdot K_{eq}} \cdot \left( K_q \cdot [P] \cdot \left( 1 + \frac{[A]}{K_{ia}} \right) + [Q] \cdot (K_p + [P]) \right)}$$

A= TSH, B= TXNox, P= TS2, Q= TXNred.  $K_{ia}$  and  $K_{iq}$  are the dissociation constants of the first substrate and the last product.

The TXN reaction was also modeled with mass action reversible kinetics

$$v = k_1 [\text{TXN}_{\text{ox}}] \cdot [\text{TSH}] - k_2 [\text{TXN}_{\text{red}}] \cdot [\text{TS}_2],$$

for which it was necessary to parameterized the  $k$  values (Fig. S2.4). The values that closely simulated the experimental *ex vivo* and *in vitro* fluxes were for TXN  $k_1=160$ ,  $k_2=1$  and for the NADPH supply reaction  $k_1=0.04$  and  $k_2=0.5$ .

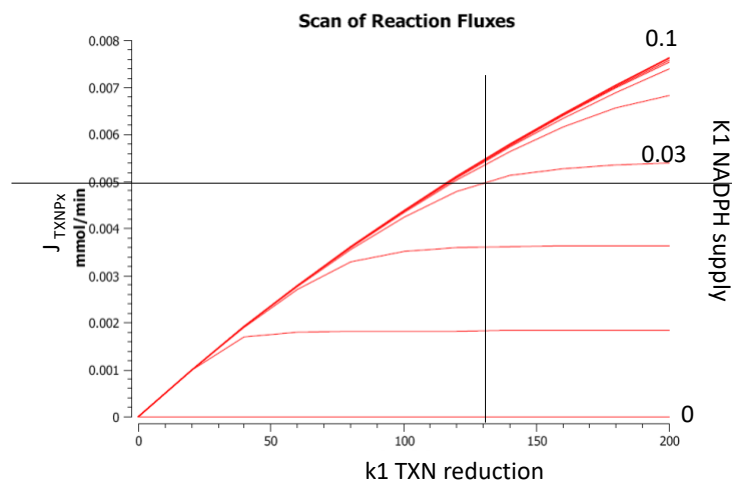

**Fig. S2.4 Parameterization of the  $k$  values of TXN and NADPH supply reactions**

A simultaneous parameter scan was performed for the  $k$  values of the two reactions to attain a similar flux to that of the reconstituted pathway.

### TXNPx equation

A bi-bi ping-pong irreversible kinetics was considered assuming that TXNPx accepts and donates the electrons from TXN in a two-step fashion.

$$v = \frac{V_m \cdot [A] \cdot [B]}{K_b \cdot [A] + K_a \cdot [B] + [A] \cdot [B]}$$

A= CumOOH, B= TXNred.

### NADPH supply

Mass action reversible kinetics

$$v = k_1 \cdot [S] - k_2 \cdot [P]$$

S= NADP and P is NADPH.  $k_1$  and  $k_2$  had arbitrary values.
